# Supplementary material for: Time-synchronic comments on video streaming website reveal core structures of audience engagement in movie viewing
Source: Frontiers journal article supplement (doi:10.3389/fpsyg.2022.1040755), 2023-01-19
Supplement: Table_4.pdf [file Table_4.pdf]

Examples of time-synchronic comments:

| Cluster | Topic                                               | Comment Example                   | Translation                                                                                                                                          | Movie                                         |
|---------|-----------------------------------------------------|-----------------------------------|------------------------------------------------------------------------------------------------------------------------------------------------------|-----------------------------------------------|
| 128     | Audience Interaction                                | 麻烦不要开头就剧透，请有点道德。                  | Please be ethical. Don't spoil the movie at the beginning!                                                                                           | <i>Happy Death Day</i>                        |
|         |                                                     | 这电影讲的都是什么，谁来说说？                   | Who can tell me what does the movie talk about?                                                                                                      | <i>Blade Runner 2049</i>                      |
|         |                                                     | 我觉得很多事情不需要知道后果，只要想就去做。            | I think that we don't need to consider much about the consequences. If we want to do something, just do it.                                          | <i>Forrest Gump</i>                           |
|         |                                                     | 不要着急离开，还有彩蛋。<br>你能想象吗，这是临场发挥。     | Don't leave in a hurry. There is a credit cookie!<br>Can you imagine that this is improvisation?                                                     | <i>Gravity</i><br><i>Iron Man</i>             |
| 112     | Female Characters                                   | 斯嘉丽约翰逊好漂亮。                        | Scarlett Johansson is so beautiful.                                                                                                                  | <i>Marriage Story</i>                         |
|         |                                                     | 龙妈这个演员总是把她生活的表情带入角色。              | Emilia Clarke always take her real life facial expressions into acting.                                                                              | <i>Me Before You</i>                          |
|         |                                                     | 这个女主角是不是演过傲慢与偏见？                  | Hasn't the female character starred in Pride and Prejudice?                                                                                          | <i>Love Actually</i>                          |
|         |                                                     | 她居然不要武器，她是不是傻？                    | Is she stupid? She doesn't want a weapon!                                                                                                            | <i>Prometheus</i>                             |
|         |                                                     | 红皇后很好的，只是她讨厌别人对她说谎。               | Red Queen is actually a nice person, but she really hates lies.                                                                                      | <i>Alice in Wonderland</i>                    |
| 37      | Movie Genre-<br>Movie Production                    | 温子仁的恐怖片都好看的。                      | James Wan's horror movies are good.                                                                                                                  | <i>The Dead Silence</i>                       |
|         |                                                     | 这是我科幻的启蒙片。                        | This is my sci-fi primer.                                                                                                                            | <i>Contact</i>                                |
|         |                                                     | 编、导、演、摄、美、录音，都是教科书级的。             | Screenplay, direction, action, shooting, stage design, and recording are all perfect and classic.                                                    | <i>Citizen Kane</i>                           |
|         |                                                     | 这不是恐怖片，这是搞笑片。<br>我觉得是最好看的科幻片没有之一。 | This is not a horror movie, it is a comedy.<br>I think it is the best scifi movie. It is uncomparable.                                               | <i>Shaun of the Dead</i><br><i>Passengers</i> |
| 124     | Death                                               | 这人后面死的好惨。                         | The man will die in a painful way later.                                                                                                             | <i>The Mummy</i>                              |
|         |                                                     | 他如果不跑就不会死。                        | If he didn't run, he would not die.                                                                                                                  | <i>Residen tEvil Apocalypse</i>               |
|         |                                                     | 知道自己的死法后，人在更多的事情面前会更胆大。           | If someone knows the way he dies, he will be braver when confronted with a lot of things.                                                            | <i>Big Fish</i>                               |
|         |                                                     | 镇上的人全部被做成蜡像了，没一个活的。               | All people in the village were made into wax figures, and no one survived.                                                                           | <i>House of Wax</i>                           |
|         |                                                     | 谁受益最大谁就是凶手呗。                      | Who benefits most from the murder, who is the murderer.                                                                                              | <i>Knives Out</i>                             |
| 26      | China-<br>China's Relationship with other Countries | 那个时候中国连自行车都还没有。                   | At that time in China, we didn't even have bicycles.                                                                                                 | <i>Pearl Harbor</i>                           |
|         |                                                     | 我觉得中国的恐怖片和美国恐怖片最相似的就是那音乐。         | I think the most similar thing between Chinese horror movies and American horror movies is the music.                                                | <i>Signs</i>                                  |
|         |                                                     | 二战德国在军事上从来没有和中国合作过。               | Germany never cooperated with China in military during World War II.                                                                                 | <i>Dunkirk</i>                                |
|         |                                                     | 从这个电影可以看出中国当年打日本有多困难。             | From this movie, we can see how difficult it was for China to beat Japan back then.                                                                  | <i>1917</i>                                   |
| 123     | Male Charaters                                      | 我想中国和美国深度合作，世界进步会更加快，探索宇宙的脚步会更快。  | I think if China and the United States cooperate deeply, the world will progress faster, and the pace of exploration of the universe will be faster. | <i>The Martian</i>                            |
|         |                                                     | 羡慕男主有这种想象力。                       | I envy the male protagonist for having such an imagination.                                                                                          | <i>The Secret Life of Walter Mitty</i>        |
|         |                                                     | 这男的真可悲，成为坏人的工具。                   | This man is so pathetic. He becomes a tool for the bad guys.                                                                                         | <i>The Da Vinci Code</i>                      |
|         |                                                     | 他的表情让我看到了绝望。                      | I see despair in his face.                                                                                                                           | <i>Cast Away</i>                              |
|         |                                                     | 斯内普很好，他才是承受最多的人。                  | Snape is a good guy. He is the one who bears the most.                                                                                               | <i>Harry Potter</i>                           |
| 132     | Audience Check-in                                   | 男主是不是有幻想症啊？                       | Does the male protagonist have delusional disorder?                                                                                                  | <i>The Machinist</i>                          |
|         |                                                     | 广东人前来打卡。                          | Guangdong people come to check-in.                                                                                                                   | <i>American History X</i>                     |
|         |                                                     | 有四川南充的吗？                          | Is there anyone from Sichuan Nanchong?                                                                                                               | <i>The Day After Tomorrow</i>                 |
|         |                                                     | 地址在昆明，来观看哈哈。                      | I'm from Kunming. I come to watch this movie, haha.                                                                                                  | <i>Gone With The Wind</i>                     |
|         |                                                     | 广西老乡你们好。<br>我是江西南昌的。              | Fellows from Guangxi, hello.<br>I'm from Jiangxi Nanchang.                                                                                           | <i>Black Hawk Down</i><br><i>Das Boot</i>     |
| 118     | Parent-Child Relationship                           | 做父亲的能理解这种父爱。                      | A father can understand this kind of love.                                                                                                           | <i>Catch Me If You Can</i>                    |
|         |                                                     | 外国人很多家里有孩子也会领养的。                  | Many foreigners who already have their own children will also adopt children.                                                                        | <i>Orphan</i>                                 |
|         |                                                     | 既然他害怕为什么不告诉妈妈真相？                  | Since he was afraid, why didn't he tell his mother the truth?                                                                                        | <i>The Sixth Sense</i>                        |
|         |                                                     | 根治教育问题要父母和社会大环境两手抓。               | If we want to solve the problem of education, we should consider both parental and social factors.                                                   | <i>Elysium</i>                                |
|         |                                                     | 要尊重孩子的梦想，自信的孩子会很聪明                | We should respect children's dreams. Confident children will be smart.                                                                               | <i>Charlie and The Chocolate Factory</i>      |
| 106     | Money                                               | 希望这个是值得花钱的片子。                     | I hope this movie is worth the money.                                                                                                                | <i>Blade Runner 2049</i>                      |
|         |                                                     | 有钱可以为所欲为。                         | If you are rich, you can do whatever you want.                                                                                                       | <i>Ready Player One</i>                       |
|         |                                                     | 还是懂法律和金融的懂得生财之道啊。                 | It is true that people who understand law and finance can earn a lot of money.                                                                       | <i>The Shawshank Redemption</i>               |
|         |                                                     | 钱不是万能的，但没钱往往是不能的。                 | Money is not all-mighty, but you can do nothing without money.                                                                                       | <i>The Pursuit of Happiness</i>               |
|         |                                                     | 大家别买，这片子很难看。                      | Please don't pay money for this movie. It is really bad.                                                                                             | <i>Split</i>                                  |

|     |                              |                            |                                                                                                       |                                    |
|-----|------------------------------|----------------------------|-------------------------------------------------------------------------------------------------------|------------------------------------|
| 77  | War-Military                 | 战争都是恐怖的。                   | Wars are all terrifying.                                                                              | <i>Inglorious Bastards</i>         |
|     |                              | 二战转折点是中途岛战役。               | The turning point of World War II was the Battle of Midway.                                           | <i>Pearl Harbor</i>                |
|     |                              | 看见了吗，战争时你我都是路边奔跑的平民。       | Did you see that? During the war you and I would be civilians running by the roadside like them.      | <i>Black Hawk Down</i>             |
|     |                              | 气氛一直压抑窒息，这就是战乱。            | The atmosphere has been suppressed and suffocated, and this is war.                                   | <i>Dunkirk</i>                     |
|     |                              | 现在世界上有好多地方还是在打仗。           | Now there are numbers of regions around the world which are having wars.                              | <i>Gone With The Wind</i>          |
| 99  | Food                         | 一个喜欢吃花生酱的死神哈哈哈哈!           | He is a Death who likes peanut butter, hahahaha!                                                      | <i>Meet Joe Black</i>              |
|     |                              | 这大鱿鱼看着就好吃。                 | The large squid looks delicious.                                                                      | <i>The Thing</i>                   |
|     |                              | 梦龙不是雪糕吗?                   | Isn's Magnum a brand of ice-cream?                                                                    | <i>Me Before You</i>               |
|     |                              | 这个意大利面看起来很好吃的样子。           | The spaghetti looks really delicious.                                                                 | <i>Hancock</i>                     |
|     |                              | 这么像包饺子。                    | The food looks like dumpling.                                                                         | <i>Maleficent</i>                  |
| 10  | Amusement                    | 金凯瑞好逗啊哈哈哈哈。                | Jim Carrey is funny, hahahaha.                                                                        | <i>The Truman Show</i>             |
|     |                              | 很好笑的，不信往下看。                | It is really amusing, please continue watching.                                                       | <i>Home Alone</i>                  |
|     |                              | 怎么这么搞笑?                    | How it can be so funny?                                                                               | <i>Forrest Gump</i>                |
|     |                              | 我真的看笑了哈哈哈哈!                | I really want to laugh when watching this hahahaha!                                                   | <i>Psycho</i>                      |
|     |                              | 美式幽默，哈哈哈哈!                 | American style humor, hahahaha!                                                                       | <i>Hacksaw Ridge</i>               |
| 109 | Marriage-Family              | 现在我的婚姻就是只剩下欺骗，希望接下来的人生好好的。 | Now the only thing left in my marriage is cheating. I hope I can live happily in the rest of my life. | <i>He’s Just Not That Into You</i> |
|     |                              | 非常真实。要想做自己千万别结婚。           | It is true. If you want to be yourself, don't get married.                                            | <i>Marriage Story</i>              |
|     |                              | 俩人三观不一致，也不知道当初是怎么结婚的。      | The two have different views. I can't understand why they get married.                                | <i>Revolutionary Road</i>          |
|     |                              | 男的不离婚是因为女的有钱。              | The man don't want to divorce because the woman is rich.                                              | <i>Gone Girl</i>                   |
|     |                              | 说到底还是因为丈夫的不信任才会有这样的悲剧。     | Anyway, it is because of her husband's distrust that such a tragedy occurs.                           | <i>Orphan</i>                      |
| 127 | Favorable Comments on Movies | 看到这就想给这个作品满分，演员很棒。         | When I see this I want to give full grade for this movie. The actors are really great.                | <i>Three Billboards</i>            |
|     |                              | 这个要耐心看，后面真的很好看。            | You have to be patient. The movie will be better later.                                               | <i>Forrest Gump</i>                |
|     |                              | 可以，编剧想法不错。                 | Good. The screenwriter has good ideas.                                                                | <i>Tenet</i>                       |
|     |                              | 看过很多遍还是很感动。                | I have watched the movie many times, and I am still moved so much.                                    | <i>Blood Diamond</i>               |
|     |                              | 好看好看，昆汀厉害啊!                | Excellent! Quentin is really a good filmmaker!                                                        | <i>Kill Bill Vol. 1</i>            |
| 86  | Fear                         | 我已经开始害怕了。                  | I start to feel scared.                                                                               | <i>The Meg</i>                     |
|     |                              | 开头真的好诡异惊悚的感觉。              | The beginning is really creepy and scary.                                                             | <i>Amelie</i>                      |
|     |                              | 啊啊啊啊啊好吓人啊!                 | Ahhhhhhh it is really scary!                                                                          | <i>The Ring</i>                    |
|     |                              | 天啊太恐怖了!                    | Oh my god it is horrifying!                                                                           | <i>District 9</i>                  |
|     |                              | 一个人看有点害怕。                  | I am watching it alone, and I am scared.                                                              | <i>The Ring</i>                    |
